# Supplementary material for: Virus-like silica nanoparticles enhance macromolecule permeationin vivo
Source: Royal Society of Chemistry journal article supplement (doi:10.1039/d3bm00137g), 2023-01-01
Supplement: d3bm00137g1.pdf [file d3bm00137g1.pdf]

## Supporting Information

Virus-like silica nanoparticles enhance macromolecule permeation *in*

*vivo*

Yuxue Cao<sup>1</sup>, Taskeen Iqbal Janjua<sup>1</sup>, Zhi Qu<sup>1</sup>, Bastian Draphoen<sup>2</sup>, Yunfan Bai<sup>1</sup>, Mika Linden<sup>2</sup>,  
Md Moniruzzaman<sup>3,4</sup>, Sumaira Z. Hasnain<sup>5, 6\*</sup>, Tushar Kumeria<sup>1,7, 8\*</sup>, Amirali Popat<sup>1\*</sup>

<sup>1</sup> School of Pharmacy, The University of Queensland, Brisbane QLD, 4102, Australia

<sup>2</sup> Institute of Inorganic Chemistry II, Ulm University, Albert-Einstein-Allee 11, 89081, Ulm,  
Germany

<sup>3</sup> Faculty of Medicine, The University of Queensland, 37 Kent Street, Woolloongabba, QLD  
4102, Australia

<sup>4</sup> Department of Gastroenterology and Hepatology, Princess Alexandra Hospital and  
Translational Research Institute (TRI), Woolloongabba, Queensland, 4102, Australia

<sup>5</sup> Immunopathology Group, Mater Research Institute, The University of Queensland,  
Translational Research Institute, Brisbane QLD, 4102, Australia

<sup>6</sup> Australian Infectious Diseases Research Centre, The University of Queensland, Brisbane  
QLD, 4102, Australia

<sup>7</sup> School of Materials Science and Engineering, The University of New South Wales, Sydney  
NSW, 2052, Australia

<sup>8</sup> Australian Centre for Nanomedicine, The University of New South Wales, Sydney NSW, .0  
2052, Australia

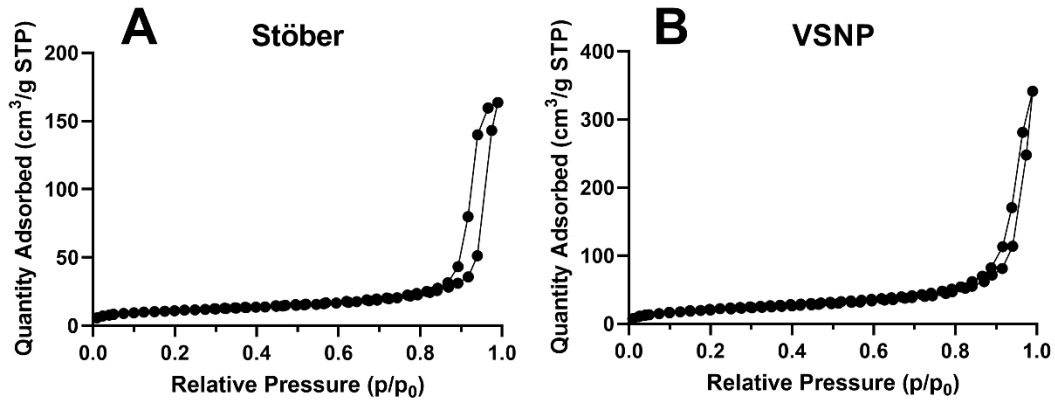

Figure S1. Nitrogen adsorption-desorption isotherms of (A) Stöber and (B) VSNP.

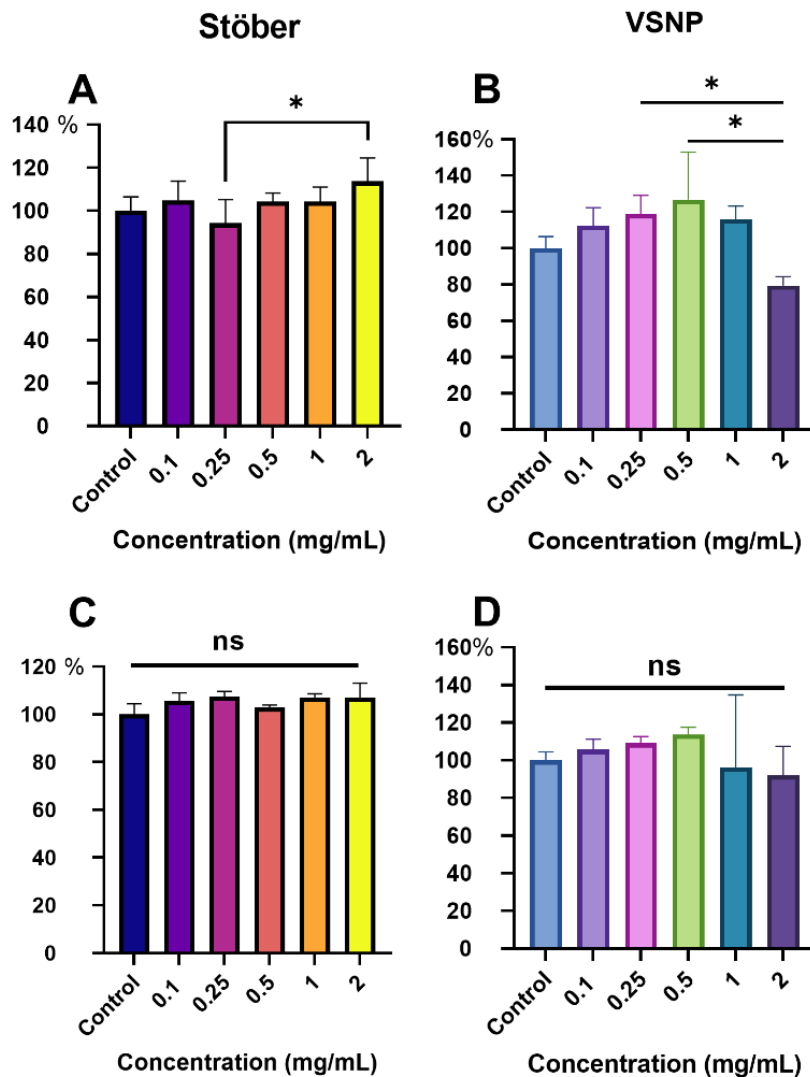

Figure S2. Cell viability test in Caco-2 (A, B) and MTX-HT29 (C, D) cell lines with cationic nanoparticles. Stöber did not show significant toxicity in both cell lines with over 90% cell viability in all groups (A,C). VSNP showed slight (cell viability 79.4%) toxicity in Caco-2 cells (B) but not in MTX-HT29 cells (D). n = 4.

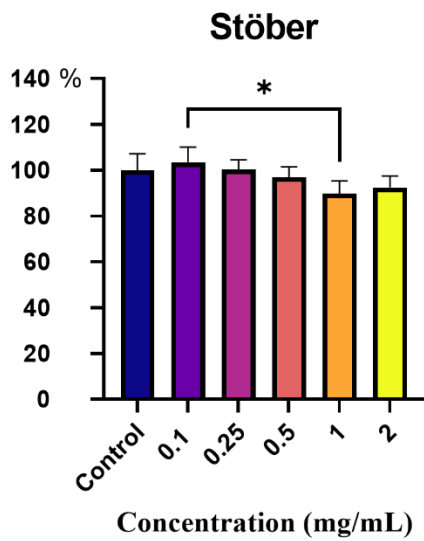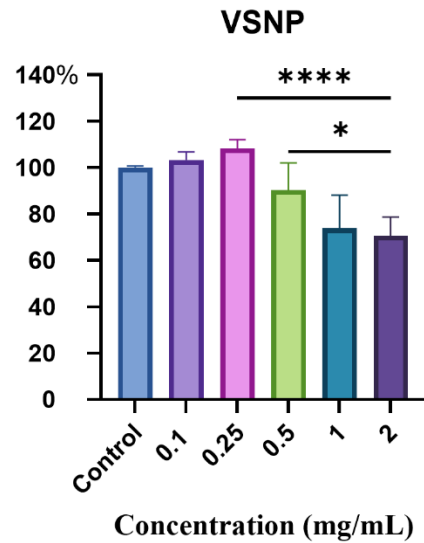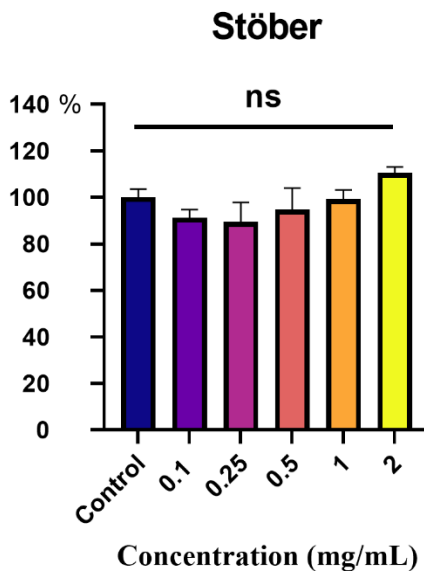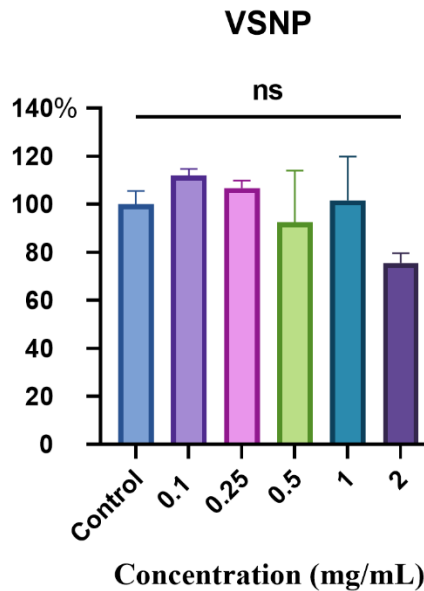

Figure S3 Cell viability test in Caco-2 (A, B) and MTX-HT29 (C, D) cell lines with anionic nanoparticles. Stöber at 1 mg/mL showed toxicity in Caco-2 cell line but had over 90% cell viability (A, C). VSNP showed slightly toxicity in Caco-2 cells at the concentration of 2 mg/mL and 1 mg/mL with around 70-80% viability (B), and 2 mg/mL induced significant cell death in MTX-HT29 cells (D). n = 4.

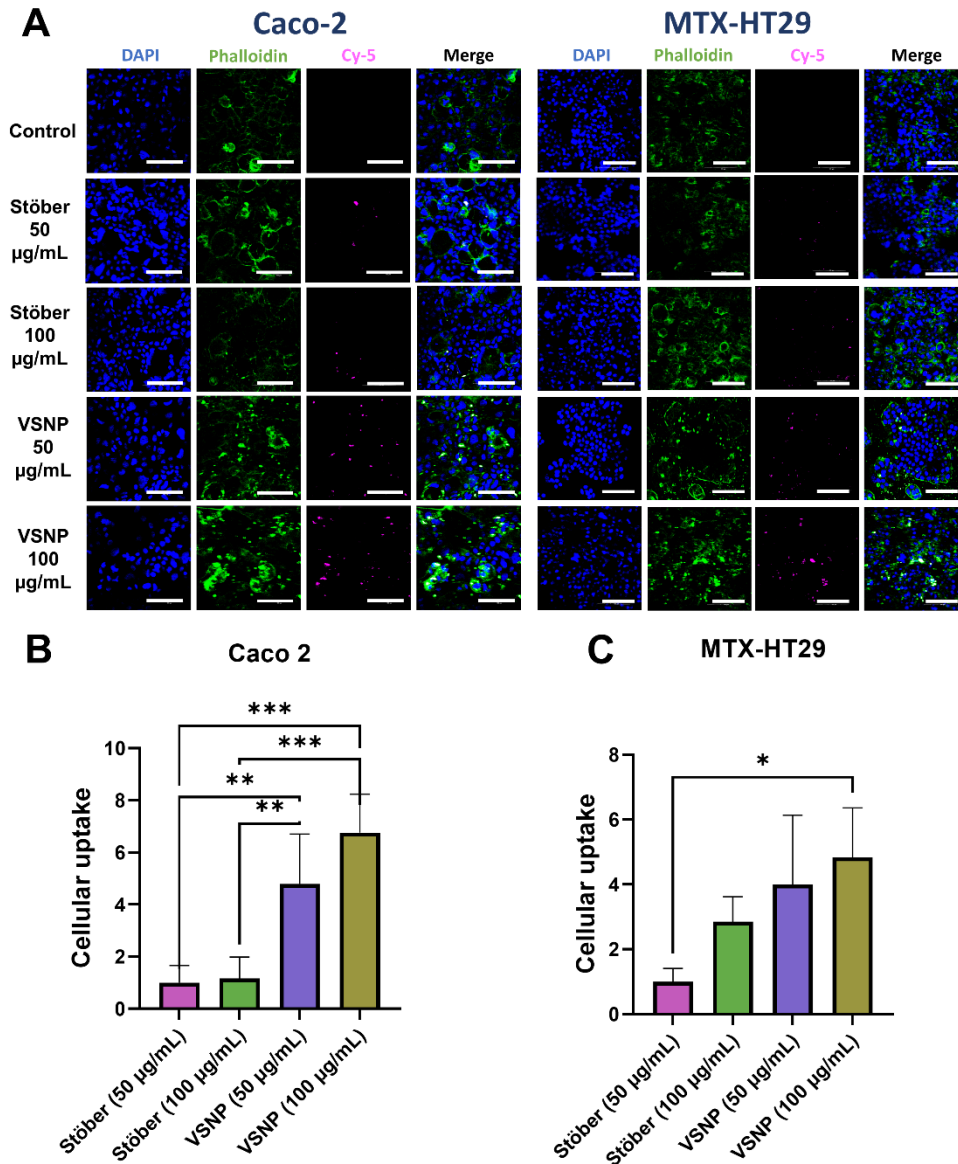

Figure S4. (A) Confocal image of cellular uptake of 60 nm Stöber and VSNP in Caco-2 cell line (left) and MTX-HT29 cell line (right) with concentration of 50  $\mu\text{g/mL}$  and 100  $\mu\text{g/mL}$ . Cell skeleton was stained by phalloidin in green, nuclei stained with DAPI in blue and nanoparticles linked with Cy5 shown in pink. Scale bar: 100  $\mu\text{m}$ . Quantification of cellular uptake from confocal images of 60 nm Stöber and VSNP in (B) Caco-2 and (C) MTX-HT29 cell line treated with 50 and 100  $\mu\text{g/mL}$  dose of nanoparticles for 24h. The fluorescent signal Cy5 and DAPI was analysed by image J with 5 images, and the Cy5 signal was normalized with DAPI. The data showed the fold change of Cy5/DAPI signal compared with Stöber (50  $\mu\text{g/mL}$ ). n=5.

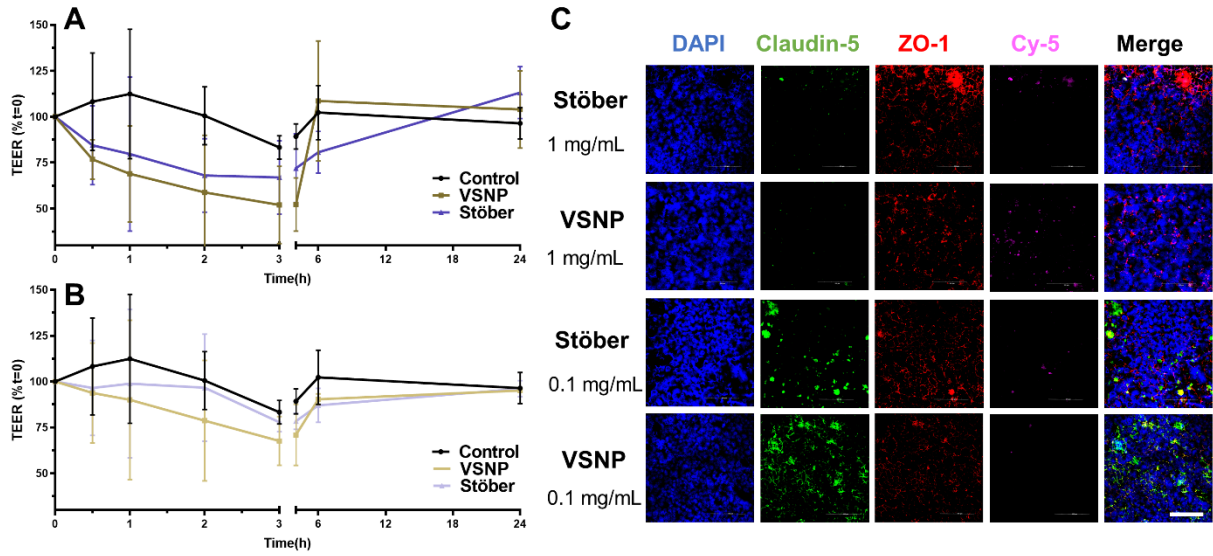

Figure S5. *In vitro* intestinal monolayer permeability in Caco-2 monolayer model. VSNP and Stöber was applied to the apical side of Caco-2 monolayer with (A) 1 mg/mL, and (B) 0.1 mg/mL. The TEER value change was recorded accordingly. (C) Representative confocal images of tight junction after VSNP and Stöber applied to Caco-2 monolayer model. The tight junction protein Claudin-5 was stained in green and Zonula occludens-1 (ZO-1) was stained in red. Silica nanoparticles are loaded with Cy5 (pink), and the nuclei is in blue. Scale Bar: 100  $\mu$ m. N=3.

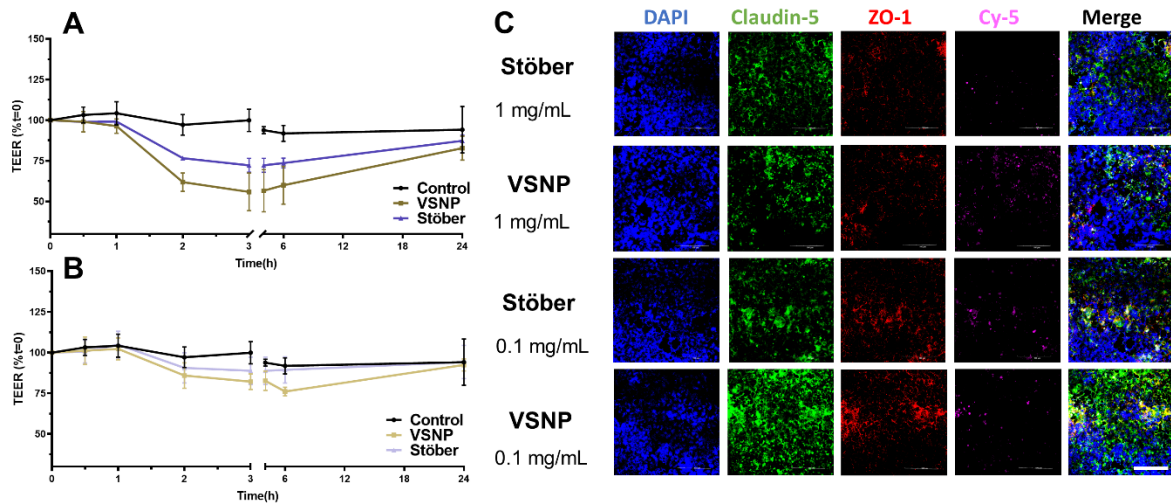

Figure S6. *In vitro* intestinal monolayer permeability in Caco-2/MTX-HT29 co-culture monolayer model. VSNP and Stöber was applied to the apical side of Caco-2/MTX-HT29 co-culture monolayer with (A) 1 mg/mL, and (B) 0.1 mg/mL. The TEER value change was recorded accordingly. (C) Representative confocal images of tight junction after VSNP and Stöber applied to Caco-2/MTX-HT29 co-culture model. The tight junction protein Claudin-5 was stained in green and Zonula occludens-1 (ZO-1) was stained in red. Silica nanoparticles are loaded with Cy5 (pink), and the nuclei is in blue. Scale Bar: 100  $\mu$ m. n=3.

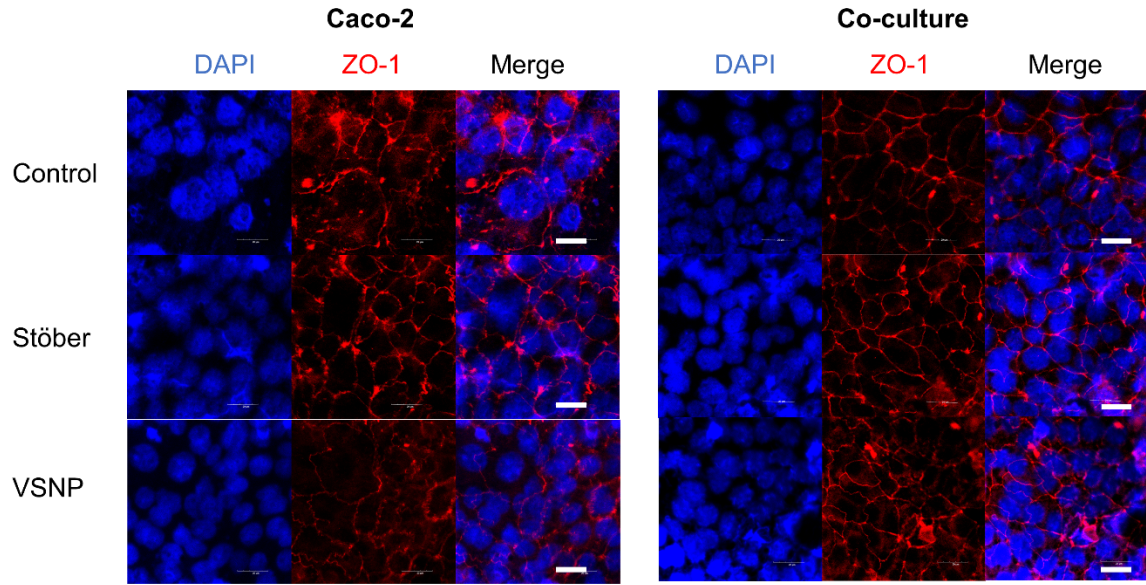

Figure S7. Representative confocal images of tight junction recovery of Caco-2 monolayer model and Caco-2/MTX-HT29 co-culture monolayer model after 24h treated by positively charged Stöber and VSNP. The tight junction protein Zonula occludens-1 (ZO-1) was stained in red, and the nuclei is in blue. Scale Bar: 20  $\mu$ m.

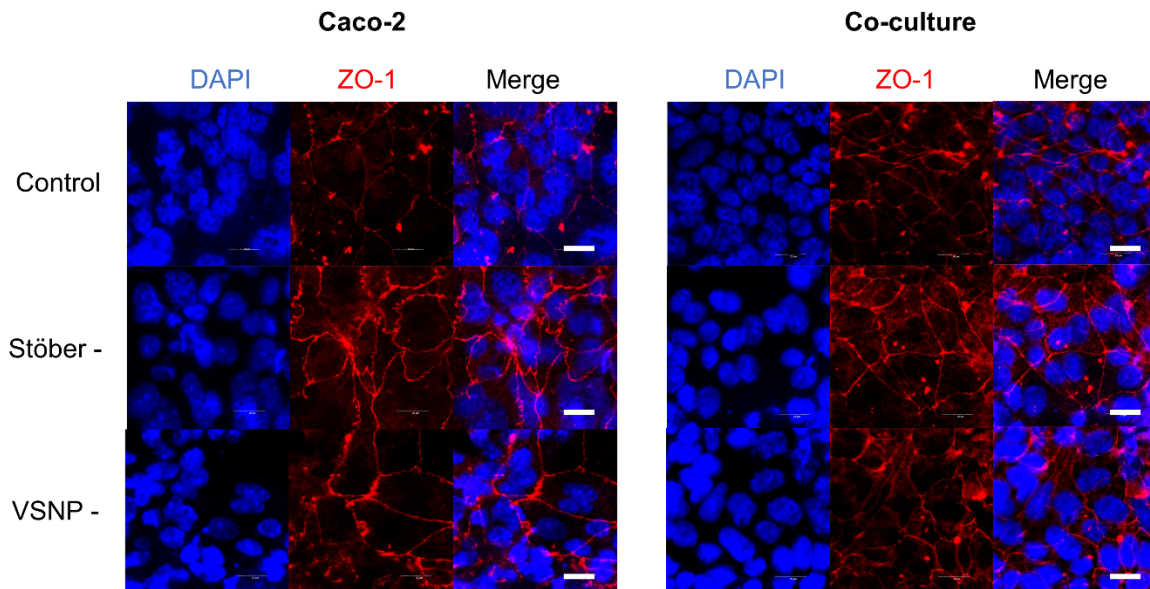

Figure S8. Representative confocal images of tight junction recovery of Caco-2 monolayer model and Caco-2/MTX-HT29 co-culture monolayer model after 24h treated by negatively charged Stöber and VSNP. The tight junction protein Zonula occludens-1 (ZO-1) was stained in red, and the nuclei is in blue. Scale Bar: 20  $\mu$ m.
